# Supplementary material for: RUNX-3-expressing CAR T cells targeting glypican-3 in patients with heavily pretreated advanced hepatocellular carcinoma: a phase I trial
Source: PubMed Central journal article supplement — eClinicalMedicine. 2023 Aug 30;63:102175. doi: 10.1016/j.eclinm.2023.102175 (PMC10480529; doi:10.1016/j.eclinm.2023.102175), 2023-08-30
Supplement: mmc1.pdf [file mmc1.pdf]

Supplementary Materials:

Supplementary Figures:

Fig. S1: Construction of CT017 CAR-T cells. (a) The modular composition of CT017 CAR-T cells. (b) CT017 GPC3-CAR expression detected by FACS.

a

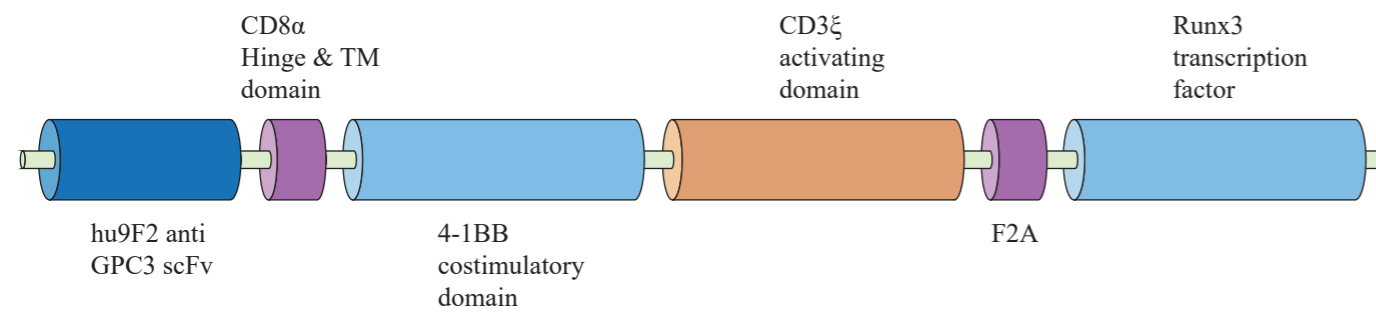

b

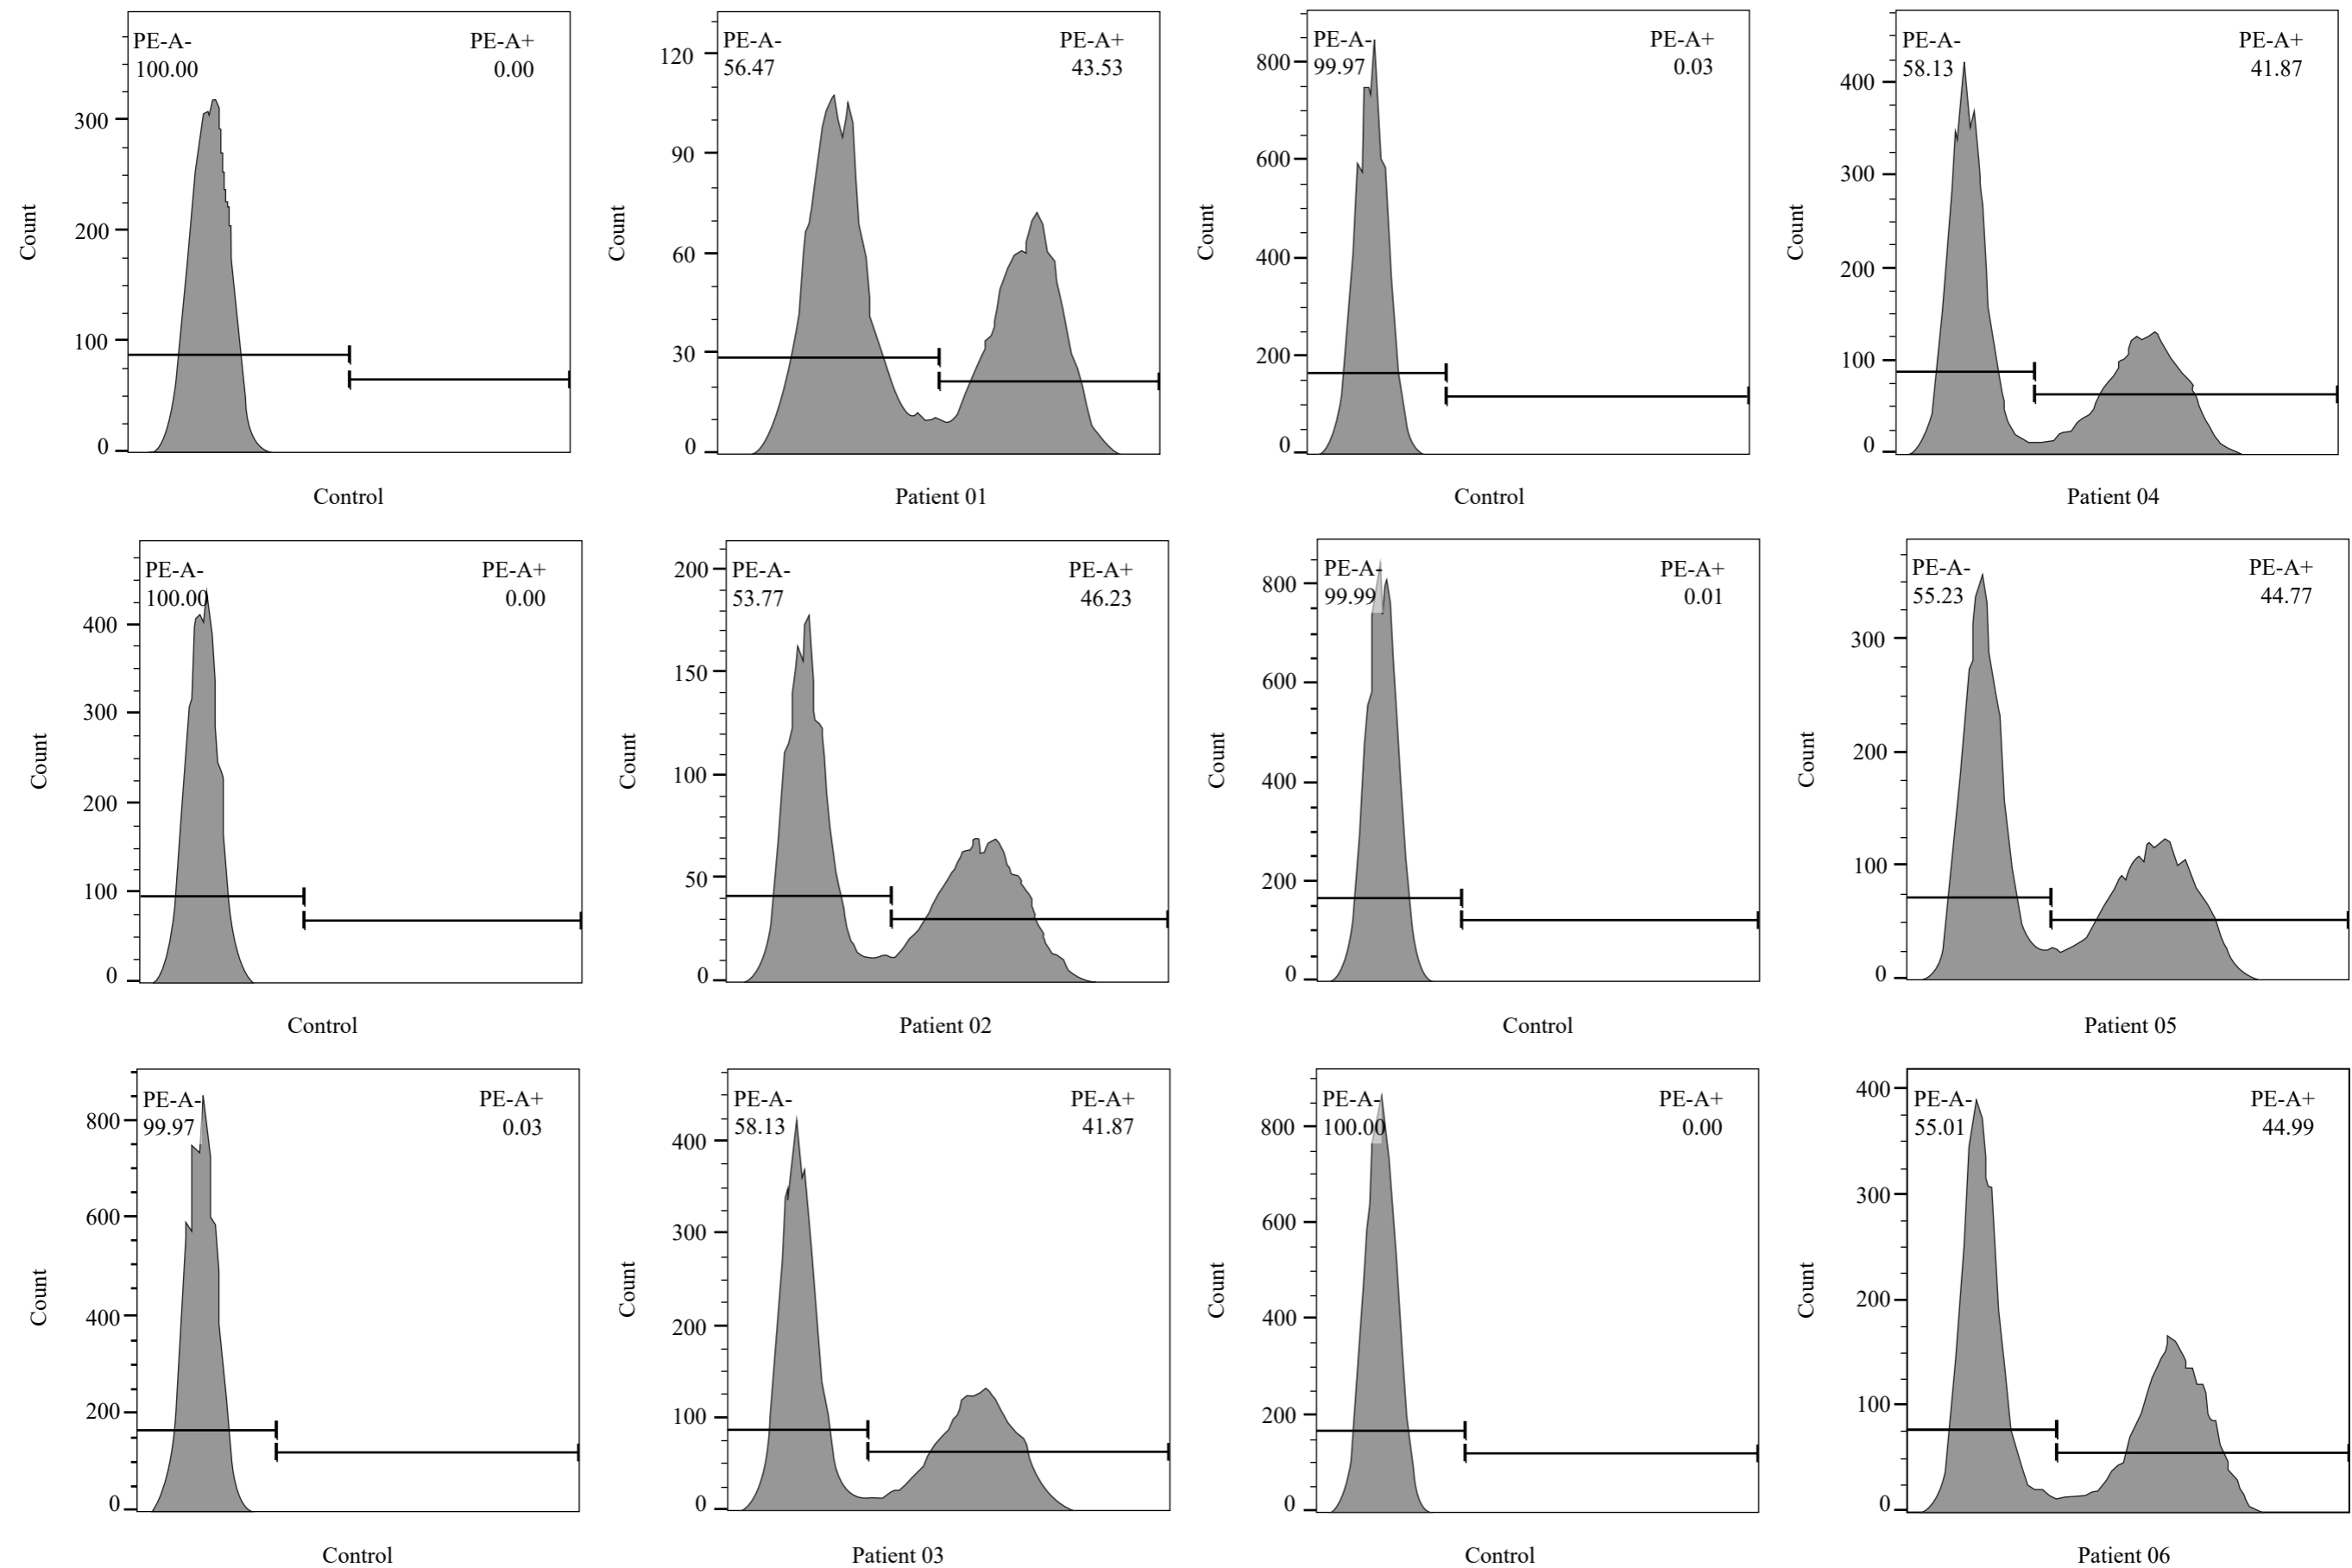

**Fig. S2 Schematic of dose-escalation phase design**

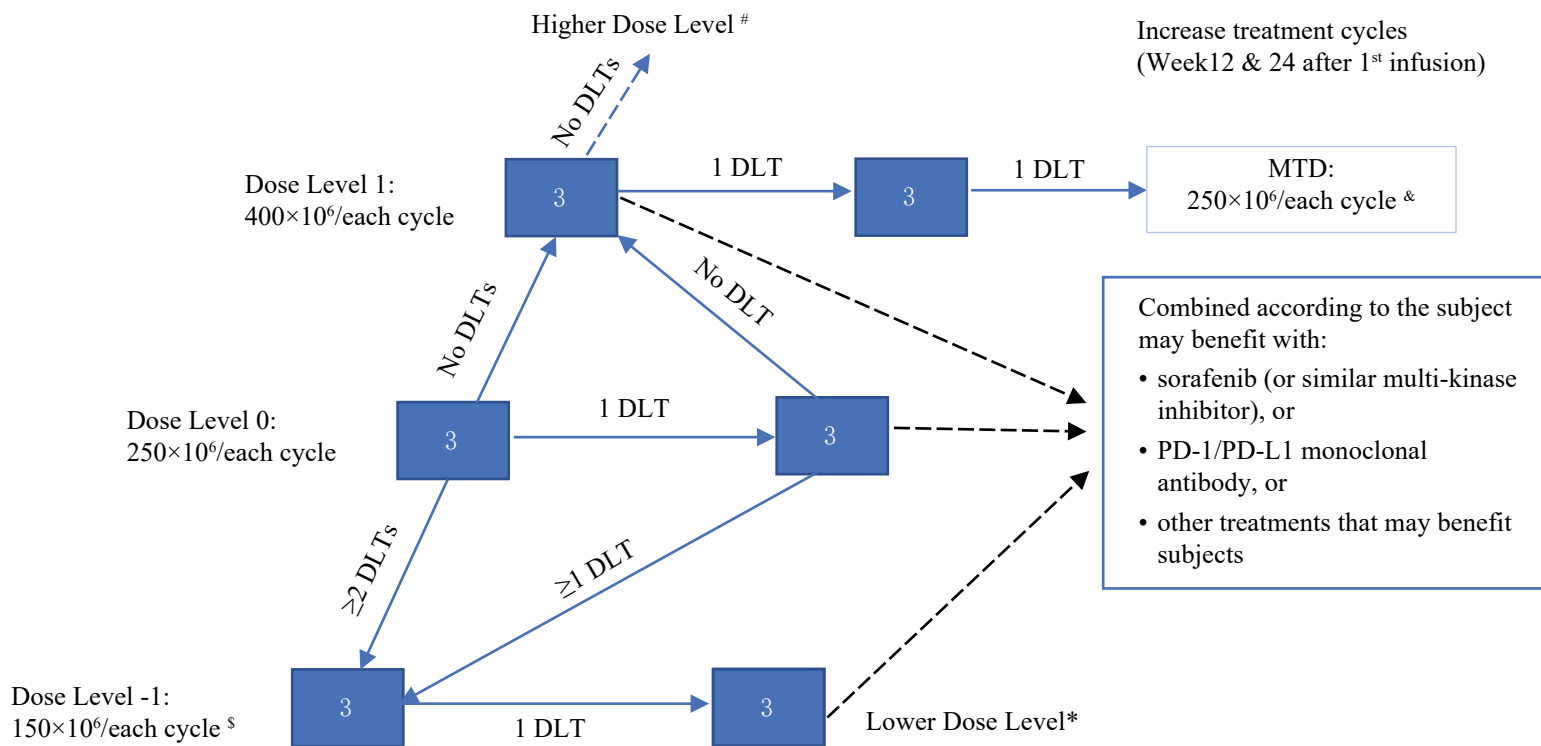

**Note:**

# If the 400×10<sup>6</sup> dose level is not identified as the MTD, escalation to a higher dose may be decided by the investigator and collaborators together.

& If up to 6 subjects are enrolled into the 250×10<sup>6</sup> dose level, then this dose level will be defined as MTD; if only 3 subjects are enrolled into the 250×10<sup>6</sup> dose level, then another 3 subjects will be enrolled into this dose level, and if there is  $\leq 1$  DLT, this dose level will be defined as MTD.

§ If there is no DLT in 3 subjects of 150×10<sup>6</sup> dose level, dose adjustment may be decided by the investigator and collaborators together.

\* If there is no DLT in the newly added 3 subjects of 150×10<sup>6</sup> dose level, this dose level will be defined as MTD; if there is one DLT in the newly added 3 subjects of 150×10<sup>6</sup> dose level, dose reduction or administration method adjustment will be decided by the investigator and collaborators together.

**Fig. S3: Protocol schedule for screening, manufacturing autologous CAR-GPC3 T cells, and lymphodepletion followed by infusion of CAR-GPC3 T cells and follow-up.**

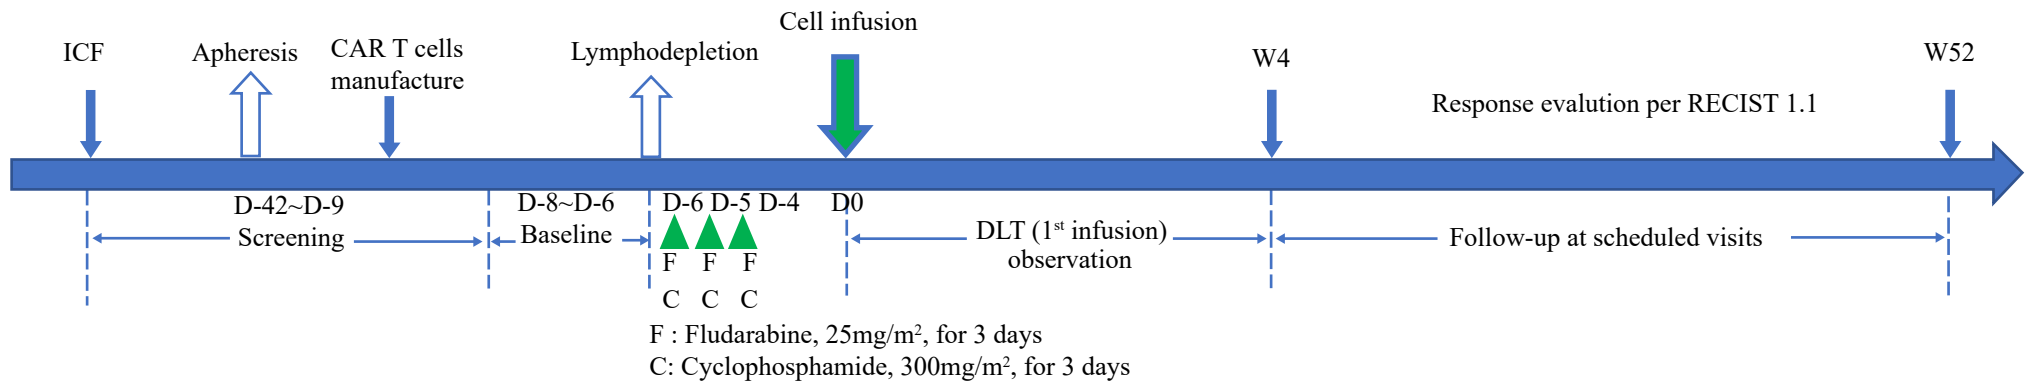

## Supplementary Tables:

**Table S1:** The affinity data of humanized anti-GPC3 single-chain variable fragment (hu9F2)

|       | $K_{on}$ ( $M^{-1}\cdot s^{-1}$ ) | $K_{off}$ ( $s^{-1}$ ) | $K_D$ (nM) |
|-------|-----------------------------------|------------------------|------------|
| hu9F2 | $7.651\times 10^5$                | $1.657\times 10^{-3}$  | 2.166      |

$K_{on}$ : association rate constant;  $K_{off}$ : dissociation rate constant;  $K_D$ : equilibrium dissociation constant;  $K_D=K_{off}/K_{on}$

**Table S2:** The listing of ADA test data

| Patient Number | Visit             | ADA Positive/Negative | ADA titers |
|----------------|-------------------|-----------------------|------------|
| 01             | Treatment (D0)    | Negative              | NA         |
| 01             | Treatment (D28)   | Negative              | NA         |
| 01             | Treatment (D84)   | Negative              | NA         |
| 02             | Treatment (D0)    | Negative              | NA         |
| 02             | Treatment (D28)   | Positive              | 1          |
| 03             | Treatment (D0)    | Negative              | NA         |
| 03             | Treatment (D28)   | Negative              | NA         |
| 03             | Treatment (D0/C2) | Negative              | NA         |
| 03             | Treatment (D84)   | Negative              | NA         |
| 04             | Treatment (D0)    | Negative              | NA         |
| 05             | Treatment (D0)    | Negative              | NA         |
| 05             | Treatment (D28)   | Positive              | 1          |
| 05             | Treatment (D0/C2) | Positive              | 4          |
| 05             | Treatment (D84)   | Positive              | 121        |
| 05             | Treatment (D168)  | Positive              | 125        |
| 06             | Treatment (D0)    | Negative              | NA         |
| 06             | Treatment (D28)   | Positive              | 56         |
| 06             | Treatment (D84)   | Positive              | 12         |

**Abbreviations:** ADA, anti-CAR-GPC3 antibodies; D, day; NA, not available
